# Supplementary material for: Development and evaluation of a colorectal cancer screening method using machine learning‐based gut microbiota analysis
Source: PubMed Central journal article supplement (PMC9385600; doi:10.1002/cam4.4671), 2022-03-22
Supplement: CAM4-11-3194-s002.pdf [file CAM4-11-3194-s002.pdf]

# Figure S1

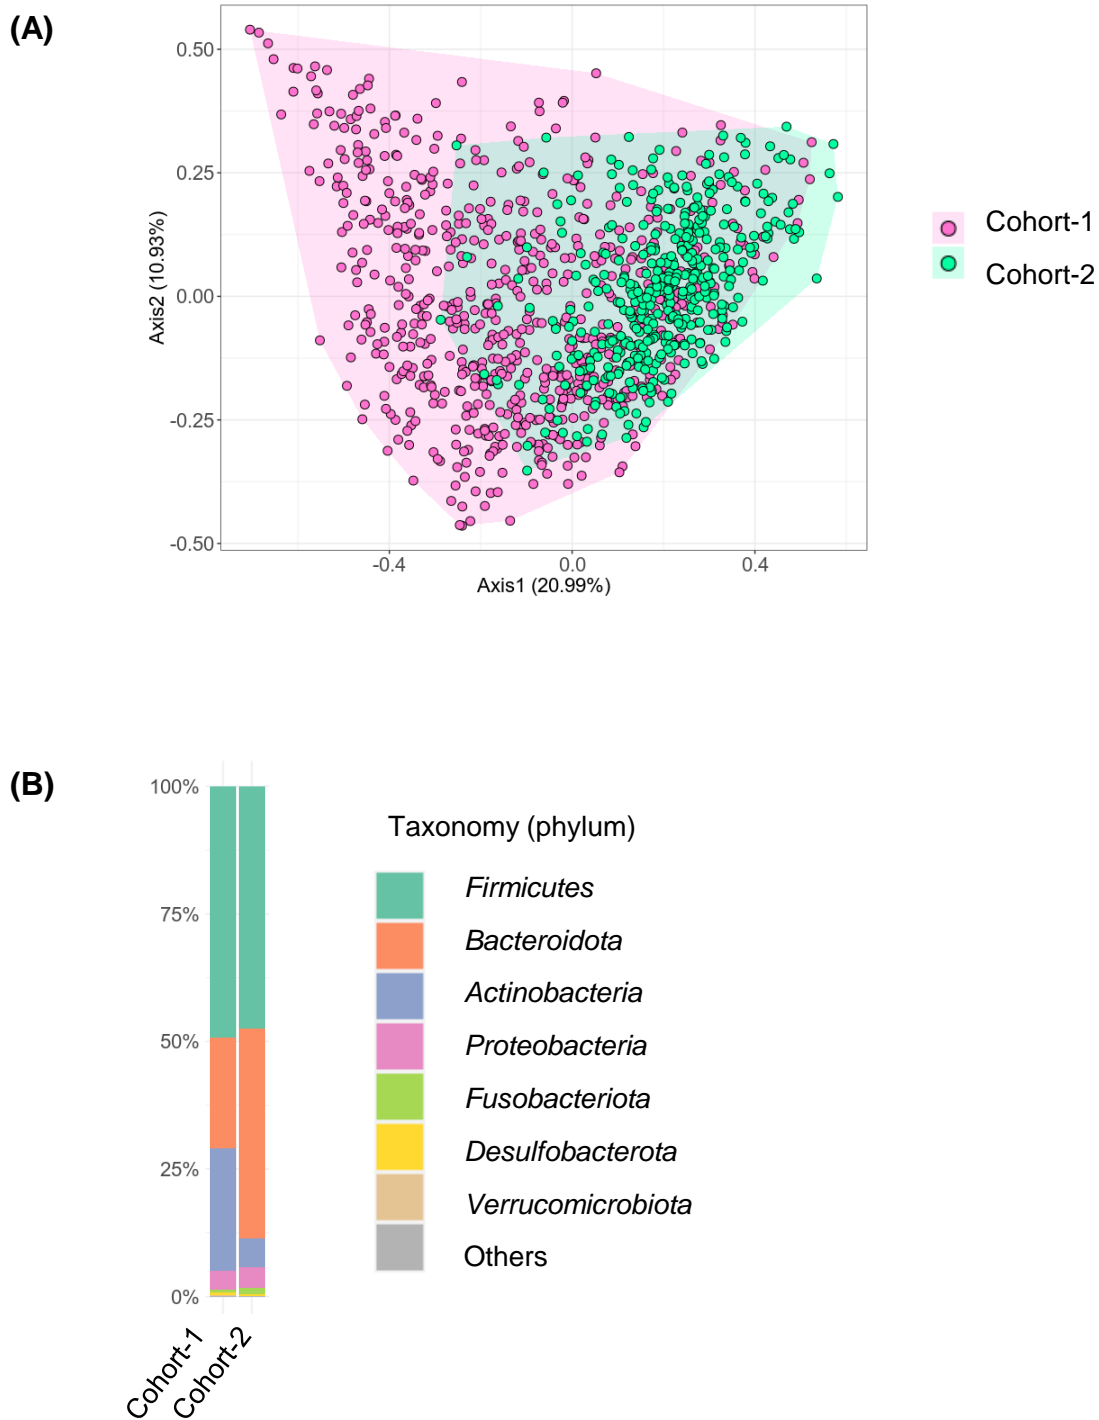

**Figure S1. Differences in gut microbiota between cohort-1 and cohort-2 samples**

(A) Principal co-ordinate analysis of the weighted UniFrac distance matrix.

(B) Gut microbiota composition of the two cohorts.

## Figure S2

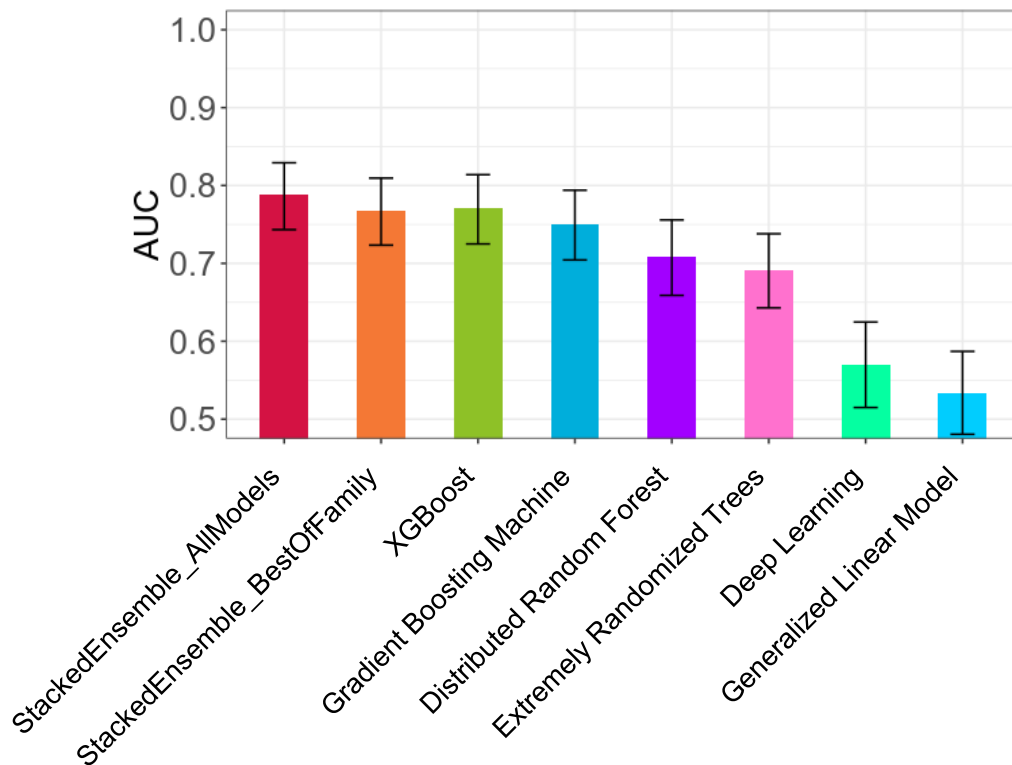

**Figure S2. Performance comparison of seven machine-learning algorithms using cohort-1**

Among the models created using each algorithm, the model with the highest AUC by cross-validation prediction was selected, and the AUC of these models for the test dataset was further compared. The training dataset consisted of 120 clean healthy individuals and 120 CRC patients, and the test dataset consisted of 150 clean healthy individuals and 133 CRC patients. Error bars indicate 95% confidence intervals, with 10,000 bootstrap replicates.

# Figure S3

(A)

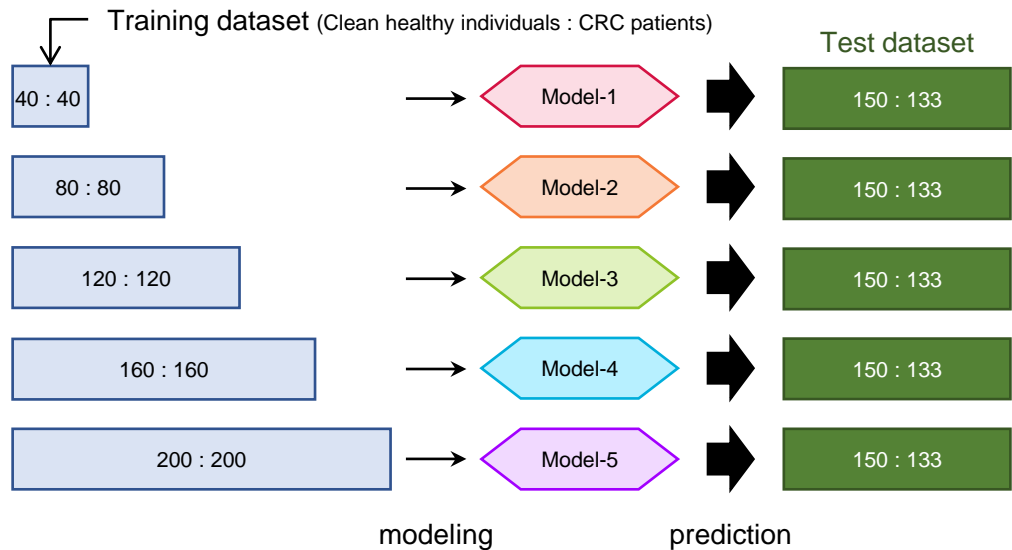

(B)

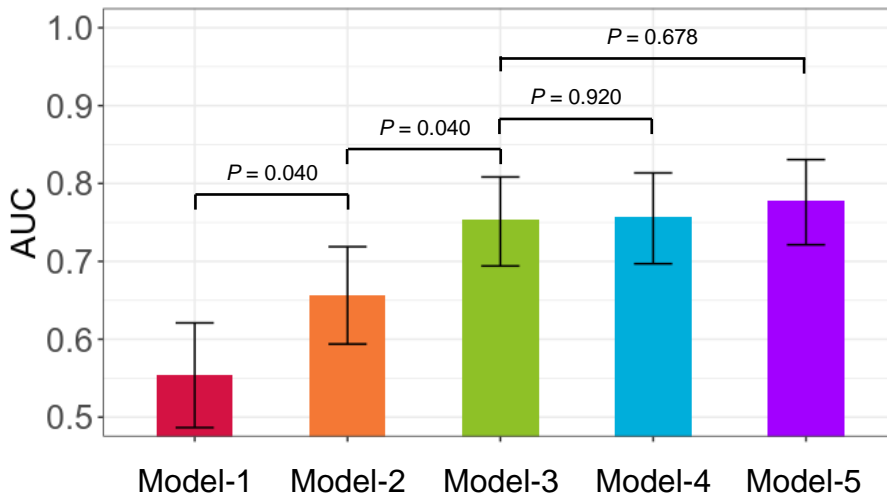

**Figure S3. Determination of the sample size needed to create a CRC diagnostic model**  
**(A)** Flow diagram. We tried to create a CRC diagnostic model by incrementally increasing the number of clean healthy individuals and CRC patients in the cohort-1 training dataset to 40 each, 80 each, 120 each, 160 each, and 200 each. The test data set consists of 150 clean healthy individuals and 133 CRC patients and is exactly the same for all five cases.

**(B)** Comparison of the AUC for the test dataset shown by five models trained on different sized training datasets. Error bars indicate 95% confidence intervals with 10,000 bootstrap replicates. Statistical significance was determined with a bootstrapping method with 10,000 resamples.  $P$  values  $< 0.05$  were considered significant.

## Figure S4

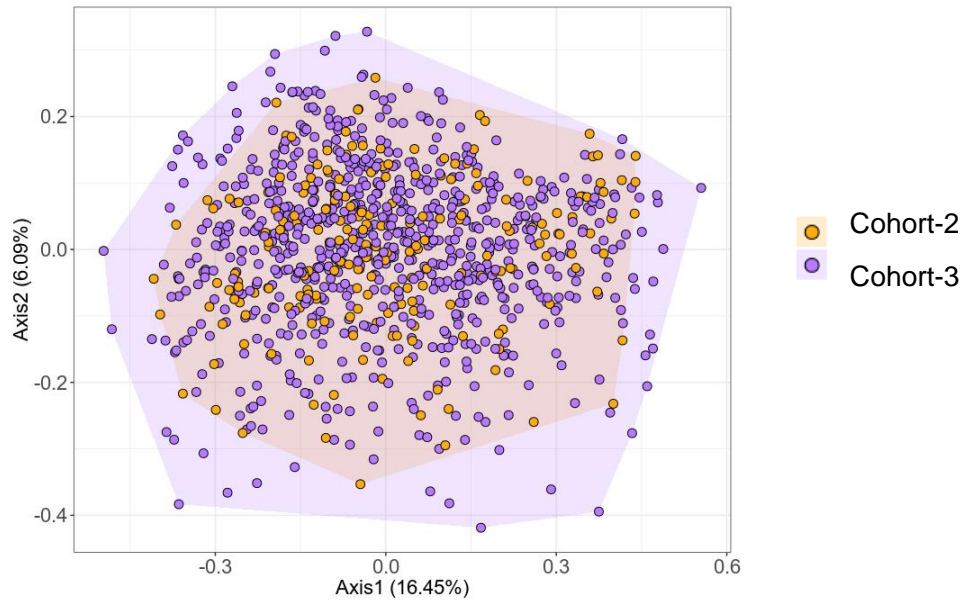

**Figure S4. Differences in gut microbiota between cohort-2 and cohort-3 samples**  
Principal co-ordinate analysis of the weighted UniFrac distance matrix.

# Table S1

**Table S1. PCR primers used in this study**

| <b>Primers for 16S rRNA gene-sequencing</b>                       |         |                                                                         |
|-------------------------------------------------------------------|---------|-------------------------------------------------------------------------|
| <b>1<sup>st</sup> PCR</b>                                         |         |                                                                         |
| <b>Primer name</b>                                                |         | <b>Sequence (overhangs are underlined)</b>                              |
| 16S-27Fmod                                                        | Forward | <u>TCGTCGGCAGCGTCAGATGTGTATAAGA</u><br><u>GACAGAGRGTGGCTCAG</u>         |
| 16S-338R                                                          | Reverse | <u>GTCTCGTGGGCTCGGAGATGTGTATAAG</u><br><u>AGACAGTGCTGCCTCCCGTAGGAGT</u> |
| <b>2<sup>nd</sup> PCR</b>                                         |         |                                                                         |
| Nextera DNA Indexes (Illumina Inc., San Diego, CA, USA)           |         |                                                                         |
| <b>Primers for quantitative real-time PCR (Guo, et al., 2018)</b> |         |                                                                         |
| <b>Primer name</b>                                                |         | <b>Sequence</b>                                                         |
| Internal control<br>(16S rRNA gene)                               | Forward | CGTCAGCTCGTGYCGTGAG                                                     |
|                                                                   | Reverse | CGTCRTCCCRCTTCC                                                         |
| <i>Fusobacterium<br/>nucleatum</i>                                | Forward | TTCAATAAAAGTGGCAGGTCAAG                                                 |
|                                                                   | Reverse | TAACAACACATGCAGGTCAATGG                                                 |
| <i>Faecalibacterium<br/>prausnitzii</i>                           | Forward | GGAGGATTGACCCCTTCAGT                                                    |
|                                                                   | Reverse | CTGGTCCCGAAGAAACACAT                                                    |
| <i>Bifidobacterium</i>                                            | Forward | TCGCGTCCGGTGTGAAAG                                                      |
|                                                                   | Reverse | CCACATCCAGCATCCAC                                                       |

## Table S2

Table S2. Summary of the study participants

| Study population     | Clean HI | CRC patients |    |    |     |    |
|----------------------|----------|--------------|----|----|-----|----|
|                      |          | Stage        |    |    |     |    |
|                      |          | 0            | I  | II | III | IV |
| <b>Training data</b> |          |              |    |    |     |    |
| Model-1              | 40       | 3            | 6  | 14 | 12  | 5  |
| Model-2              | 80       | 4            | 16 | 26 | 23  | 11 |
| Model-3              | 120      | 4            | 27 | 31 | 42  | 16 |
| Model-4              | 160      | 7            | 39 | 42 | 54  | 18 |
| Model-5              | 200      | 8            | 49 | 50 | 71  | 22 |
| <b>Test data</b>     | 150      | 6            | 32 | 34 | 49  | 12 |

HI: Healthy individuals
